# Supplementary material for: Camostat Does Not Inhibit the Proteolytic Activity of Neutrophil Serine Proteases
Source: MDPI journal article supplement (doi:10.3390/ph15050500), 2022-04-20
Supplement: s1 [file s1]

**Supplementary data: Table S1. Ligand information**

| No | Ligand                                                                                                                                                     | PubChem CID                                                                                                                                     | Canonical SMILES                                                                                                 | Relevance (Inhibition of)                                                     |
|----|------------------------------------------------------------------------------------------------------------------------------------------------------------|-------------------------------------------------------------------------------------------------------------------------------------------------|------------------------------------------------------------------------------------------------------------------|-------------------------------------------------------------------------------|
| 1  | <b>Camostat mesylate (Camostat)</b><br>[4-[2-[2-(dimethylamino)-2-oxoethoxy]-2-oxoethyl]phenyl] 4-(diaminomethylideneamino) benzoate;methanesulfonic acid  | 5284360                                                                                                                                         | <chem>N(C)(C)C(=O)COC(=O)CC1C=CC(OC(=O)C2C=C C(NC(=N)N)=CC=2)=CC=1</chem>                                        | Clinically proven protease inhibitor for trypsin-like serine proteases        |
| 3  | <b>GBA</b><br>4-guanidinobenzoic acid                                                                                                                      | 159772                                                                                                                                          | <chem>C1=CC(=CC=C1C(=O)O)N=C(N)N</chem>                                                                          | Inactive metabolite of Camostat<br>Co-crystallized with TMPRSS2, PDB ID, 7MEQ |
| 4  | <b>Cathepsin G Inhibitor I (CatGinh)</b><br>[2-[3-[(1-benzoylpiperidin-4-yl)-methylcarbamoyl]naphthalen-2-yl]-1-naphthalen-1-yl-2-oxoethyl]phosphonic acid | 9830518                                                                                                                                         | <chem>C1C=CC(C(=O)N2CCC(N(C)C(=O)C3C=C4C=CC=CC4=CC=3C(=O)C(P(O)(O)=O)C3C4C=CC=CC=4C=CC=3)CC2)=CC=1</chem>        | Reversible inhibitor of CatG                                                  |
| 5  | <b>Suc-Val-Pro-Phe<sup>P</sup>-(OPh)<sub>2</sub> (SucVPF or 1ZG)</b>                                                                                       | <a href="https://www.brenda-enzymes.org/ligand.php?brenda_ligand_id=18430">https://www.brenda-enzymes.org/ligand.php?brenda_ligand_id=18430</a> | <chem>C(CCC(O)=O)(=O)N[C@@H](C(C)C)C(N1[C@H](C(=O)NC(CC2C=CC=CC=2)P(OC2C=CC=CC=2)(=O)OC2C=CC=CC=2)CCC1)=O</chem> | Irreversible inhibitor of CatG;<br>Co-crystallized with CatG, PDB ID, 1CGH    |
| 6  | <b>Sivelestat</b><br>2-[[[2-[[4-(2,2-dimethylpropanoyloxy)phenyl]sulfonylamino]benzoyl]amino]acetic acid                                                   | 107706                                                                                                                                          | <chem>CC(C)(C)C(=O)OC1=CC=C(C=C1)S(=O)(=O)NC2=CC=CC=C2C(=O)NCC(=O)O</chem>                                       | Reversible inhibitor of neutrophil elastase, also inhibits PR3                |

**Table S2: Amino acids involved in protein-ligand interactions for docking TMPRSS2 and CatG.**

| AutoDock Tools                 | Redocked GBA-TMPRSS2<br>(7MEQ)<br>RMSD: 0.64 Å  |                                                             | Camostat-TMPRSS2                                |                                                   | Redocked SucVPF-CatG<br>(1CGH)<br>RMSD 1.25 Å       |                                                                            | Camostat-CatG                                                      |                                   | GBA-CatG                                        |                                                     | CatG inhibitor-CatG                             |                                                  |
|--------------------------------|-------------------------------------------------|-------------------------------------------------------------|-------------------------------------------------|---------------------------------------------------|-----------------------------------------------------|----------------------------------------------------------------------------|--------------------------------------------------------------------|-----------------------------------|-------------------------------------------------|-----------------------------------------------------|-------------------------------------------------|--------------------------------------------------|
|                                | H-bonds: 9<br>Hydrophobic: -<br>Salt bridges: 1 |                                                             | H-bonds: 7<br>Hydrophobic: 5<br>Salt bridges: 1 |                                                   | H-bonds: 10<br>Hydrophobic: 5<br>Salt bridges: -    |                                                                            | H-bonds: 5<br>Hydrophobic: 5<br>Salt bridges: 2<br>Pi-stackings: 1 |                                   | H-bonds: 8<br>Hydrophobic: 1<br>Salt bridges: 3 |                                                     | H-bonds: 6<br>Hydrophobic: 5<br>Pi-stackings: 1 |                                                  |
| Predicted free binding energy  | -7.31 kcal/mol                                  |                                                             | -8.69 kcal/mol                                  |                                                   | -8.75 kcal/mol                                      |                                                                            | -6.52 kcal/mol                                                     |                                   | -4.90kcal/mol                                   |                                                     | -9.65 kcal/mol                                  |                                                  |
| Ki<br>[Temperature = 298.15 K] | 4.41 µM                                         |                                                             | 424.27 nM                                       |                                                   | 385.31 nM                                           |                                                                            | 16.67 µM                                                           |                                   | 254.38 µM                                       |                                                     | 83.88 nM                                        |                                                  |
|                                | Residues                                        | Distance (Å)                                                | Residues                                        | Distance (Å)                                      | Residues                                            | Distance (Å)                                                               | Residues                                                           | Distance (Å)                      | Residues                                        | Distance (Å)                                        | Residues                                        | Distance (Å)                                     |
| Hydrogen bonds                 | S436<br>G439<br>D440<br>S441<br>G462<br>R470    | 2.08/3.25<br>2.44<br>2.90<br>1.94/2.63/2.42<br>2.69<br>3.10 | S436<br>G439<br>D440<br>S441<br>G462<br>R470    | 2.16/3.47<br>2.12<br>3.06<br>2.34<br>2.73<br>3.48 | H57<br>F191<br>G193<br>D194<br>S195<br>G216<br>S218 | 2.88<br>2.29<br>1.90<br>3.24<br><b>2.94/3.10</b><br>2.71/2.08/2.04<br>3.30 | Q96<br>A190<br>S195<br>K217                                        | 1.70<br>2.10/1.83<br>2.01<br>2.14 | G193<br>D194<br>S195<br>Y215<br>K217            | 3.17<br>3.00<br>2.96/2.29/1.87<br>3.09<br>2.00/3.15 | H57<br>K192<br>G193<br>S195<br>S218             | 2.11<br>2.68<br>3.28<br><b>2.20/2.32</b><br>1.73 |
| Salt bridges                   | D435                                            | 3.48                                                        | D435                                            | 3.78                                              | -                                                   | -                                                                          | H57<br>E226                                                        | 4.16<br>4.29                      | H57<br>E226                                     | 5.49<br>4.30                                        | -                                               | -                                                |
| Hydrophobic interactions       | -                                               | -                                                           | Q438<br>V280                                    | 3.92<br>3.62                                      | I99<br>F172<br>F191<br>K192<br>Y215                 | 3.59<br>3.94<br>3.44<br>3.13<br>3.63                                       | H57<br>I99<br>K192<br>Y215                                         | 3.05<br>3.09/3.66<br>3.76<br>3.44 | V213                                            | 3.66                                                | I99<br>F172<br>V213<br>Y215<br>K217             | 3.47<br>3.53<br>3.05<br>3.31<br>3.75             |
| Pi-stacking                    | -                                               | -                                                           | -                                               | -                                                 |                                                     |                                                                            | H57                                                                | 3.60                              | -                                               | -                                                   | H57                                             | 5.19/3.94                                        |

**Table S3: Amino acids involved in protein-ligand interactions for docking of NE and PR3.**

| AutoDock Tools                        | Camostat-NE                                                        |                           | Sivelestat-NE                                   |                                           | Camostat-PR3                                    |                      | Sivelestat-PR3                                  |                              |
|---------------------------------------|--------------------------------------------------------------------|---------------------------|-------------------------------------------------|-------------------------------------------|-------------------------------------------------|----------------------|-------------------------------------------------|------------------------------|
|                                       | H-bonds: 5<br>Hydrophobic: 5<br>Salt bridges: 2<br>Pi-stackings: 1 |                           | H-bonds: 6<br>Hydrophobic: 5<br>Salt bridges: 1 |                                           | H-bonds: 3<br>Hydrophobic: 2<br>Salt bridges: 2 |                      | H-bonds: 4<br>Hydrophobic: 2<br>Salt bridges: 1 |                              |
| <b>Predicted free binding energy</b>  | -6.35 kcal/mol                                                     |                           | -7.03 kcal/mol                                  |                                           | -6.19 kcal/mol                                  |                      | -6.50 kcal/mol                                  |                              |
| <b>Ki</b><br>[Temperature = 298.15 K] | 21.97 $\mu$ M                                                      |                           | 7.01 $\mu$ M                                    |                                           | 29.17 $\mu$ M                                   |                      | 17.26 $\mu$ M                                   |                              |
|                                       | Residues                                                           | Distance (Å)              | Residues                                        | Distance (Å)                              | Residues                                        | Distance (Å)         | Residues                                        | Distance (Å)                 |
| Hydrogen bonds                        | R177<br>S214<br>V216                                               | 2.8<br>3.43<br>2.48       | H57<br>G193<br>D194<br>S195<br>S214             | 2.70<br>1.91<br>3.58<br>2.83/1.88<br>1.95 | H40<br>W141<br>S195                             | 2.25<br>3.40<br>1.79 | H57<br>S195<br>S214<br>V216                     | 3.18<br>1.64<br>2.41<br>2.51 |
| Salt bridges                          | R177                                                               | 3.74                      | H57                                             | 3.93                                      | H57<br>R143                                     | 5.15<br>5.06         | K99                                             | 3.43                         |
| Hydrophobic interactions              | F192<br>F215<br>216                                                | 3.08<br>3.21/3.22<br>3.86 | V62<br>F192<br>V216                             | 3.99<br>3.80/3.84<br>2.23/3.38            | P151                                            | 3.28/3.44            | F41<br>P161                                     | 3.84<br>3.63                 |

**Table S4: Software and online tools used.**

| <b>Software (version)/<br/>online tool</b> | <b>Website</b>                                                                                                                                                                                | <b>Reference</b>                                                                    |
|--------------------------------------------|-----------------------------------------------------------------------------------------------------------------------------------------------------------------------------------------------|-------------------------------------------------------------------------------------|
| AutoDock 4.2.6                             | <a href="http://autodock.scripps.edu/downloads/autodock-registration/autodock-4-2-download-page/">http://autodock.scripps.edu/downloads/autodock-registration/autodock-4-2-download-page/</a> | <a href="https://doi.org/10.1002/jcc.21334">doi.org/10.1002/jcc.21334</a>           |
| AutoDockTools 1.5.7                        | <a href="http://autodock.scripps.edu/resources/adt">http://autodock.scripps.edu/resources/adt</a>                                                                                             | <a href="https://doi.org/10.1002/jcc.21256">doi.org/10.1002/jcc.21256</a>           |
| Avogadro 1.2.0                             | <a href="http://avogadro.cc/">http://avogadro.cc/</a>                                                                                                                                         | <a href="https://doi.org/10.1186/1758-2946-4-17">doi.org/10.1186/1758-2946-4-17</a> |
| PyMOL 2.4.2                                | <a href="https://pymol.org/2/">https://pymol.org/2/</a>                                                                                                                                       | The PyMOL Molecular Graphics System, Version 1.2r3pre, Schrödinger, LLC.            |
| PLIP                                       | <a href="https://plip-tool.biotec.tu-dresden.de/plip-web/plip/index">https://plip-tool.biotec.tu-dresden.de/plip-web/plip/index</a>                                                           | <a href="https://doi.org/10.1093/nar/gkab294">doi.org/10.1093/nar/gkab294</a>       |
| PDB                                        | <a href="http://www.rcsb.org/pdb/">http://www.rcsb.org/pdb/</a>                                                                                                                               | <a href="https://doi.org/10.1093/nar/28.1.235">doi.org/10.1093/nar/28.1.235</a>     |
| PubChem                                    | <a href="https://pubchem.ncbi.nlm.nih.gov/">https://pubchem.ncbi.nlm.nih.gov/</a>                                                                                                             | <a href="https://doi.org/10.1093/nar/gkab294">doi.org/10.1093/nar/gkab294</a>       |
| OpenBabel 3.1.1                            | <a href="http://openbabel.org/wiki/Main_Page">http://openbabel.org/wiki/Main_Page</a>                                                                                                         | <a href="https://doi.org/10.1186/1758-2946-3-33">doi.org/10.1186/1758-2946-3-33</a> |
